# Supplementary material for: Monitoring biomass burning aerosol transport using CALIOP observations and reanalysis models: a Canadian wildfire event in 2019
Source: Copernicus journal article supplement (doi:10.5194/egusphere-2023-1945), 2023-09-15
Supplement: Supplementary file [file egusphere-2023-1945-RC1-supplement.pdf]

Review of egosphere-2023-1945: "Monitoring biomass burning aerosol transport using CALIOP observations and reanalysis models: a Canadian wildfire event in 2019", by Shang et al.

The authors assess mass transport in the CAMS and MERRA-2 reanalysis data sets using measurements of wildfire smoke acquired by the CALIPSO lidar and by several ground-based lidars. The paper is well organized and the subject matter is appropriate for ACP.

Below I have attached an annotated version of the manuscript that contains several (mostly minor) comments and suggestions. I recommend publication once these have been addressed. Because I am well acquainted with lidar measurements, but less so with the model predictions, my comments focus almost exclusively on the handling and interpretation of the lidar data.

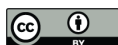

# Monitoring biomass burning aerosol transport using CALIOP observations and reanalysis models: a Canadian wildfire event in 2019

Xiaoxia Shang<sup>1</sup>, Antti Lipponen<sup>1</sup>, Maria Filioglou<sup>1</sup>, Anu-Maija Sundström<sup>2</sup>, Mark Parrington<sup>3</sup>, Virginie Buchard<sup>4,5</sup>, Anton S. Darmanov<sup>5</sup>, Ellsworth J. Welton<sup>5</sup>, Eleni Marinou<sup>6</sup>, Vassilis Amiridis<sup>6</sup>, Michael Sicard<sup>7,8</sup>, Alejandro Rodríguez-Gómez<sup>7</sup>, Mika Komppula<sup>1</sup>, and Tero Mielonen<sup>1</sup>

<sup>1</sup>Finnish Meteorological Institute, Kuopio, Finland.

<sup>2</sup>Finnish Meteorological Institute, Helsinki, Finland.

<sup>3</sup>European Centre for Medium-Range Weather Forecasts, Bonn, Germany.

<sup>4</sup>GESTARII, University of Maryland Baltimore County, Baltimore, Maryland, USA.

<sup>5</sup>National Aeronautics and Space Administration (NASA), Goddard Space Flight Center, Greenbelt, Maryland, USA.

<sup>6</sup>IAASARS, National Observatory of Athens, Athens, Greece.

<sup>7</sup>CommSensLab, Department of Signal and Theory and Communications, Universitat Politècnica de Catalunya (UPC), Barcelona, 08034, Spain.

<sup>8</sup>now at Laboratoire de l'Atmosphère et des Cyclones (LACy), Université de la Réunion, Saint-Denis, 97744, France.

**Correspondence:** Xiaoxia Shang (xiaoxia.shang@fmi.fi)

**Abstract.** In May-June 2019, smoke plumes from wildfires in Alberta, Canada, were advected all the way to Europe. To analyze the evolution of the plumes and to estimate the amount of smoke aerosols transported to Europe, retrievals from the space-borne lidar CALIOP (Cloud-Aerosol Lidar with Orthogonal Polarization) were used. The plumes were located with the help of a trajectory analysis, and the mass of smoke aerosols were retrieved from the CALIOP observations. The accuracy of the CALIOP mass retrievals was compared with the accuracy of ground-based lidars/ceilometer near the source in North America and after the long-range transport in Europe. Overall, CALIOP and the ground-based lidars/ceilometer produced comparable results. Over North America the CALIOP layer mean mass was 30 % smaller than the ground-based estimates, whereas over Southern Europe that difference varied between 12 % and 43 %. Finally, the CALIOP mass retrievals were compared with simulated aerosol concentrations from two reanalysis models, MERRA-2 (Modern-Era Retrospective analysis for Research and Applications, Version 2) and CAMS (Copernicus Atmospheric Monitoring System). The simulated total column aerosol optical depths (AOD) and the total column mass concentration of smoke agreed quite well with CALIOP observations, but the comparison of the layer mass concentration of smoke showed significant discrepancies. The amount of smoke aerosols in the model simulations was consistently smaller than in the CALIOP retrievals. These results highlight the limitations of such models, and more specifically their limitation to reproduce properly the smoke vertical distribution. They indicate that CALIOP is a useful tool monitoring smoke plumes over secluded areas whereas reanalysis models have difficulties in representing the aerosol mass in these plumes. This study shows the advantages of space-borne aerosol lidars, e.g. being of paramount importance to monitor smoke plumes, and reveals the urgent need of future lidar missions in space.



## 1 Introduction

Boreal wildfires are common, with their location, intensity, and extent to vary from year to year. Moreover, it is expected that future fire activity will increase as a result of global warming (Descals et al., 2022). The characteristics of wildfires and their emissions depend on the properties of the fuel available, meteorological conditions, and burning conditions. There are more high-intensity crown fires in North American forests than in Eurasia, where lower-intensity surface fires are common. The North American fires tend to spread faster, burn longer, and emit smoke higher into the atmosphere than the Eurasian fires (Rogers et al., 2015).

Wildfires emit extensive amounts of carbonaceous aerosols, such as organic (OC) and black carbon (BC), into the atmosphere. The emissions from boreal fires are particularly interesting as they are located in the vicinity of the pristine Arctic and can be transported there. Our knowledge of carbonaceous aerosols in the atmosphere depends heavily on model results as there is a lack of global-scale observations. For the concentration of BC, models agree with each other within a factor of two in Europe and North America. However, the models underestimate the concentration of BC at the surface in the Arctic by one or two orders of magnitude. Consequently, there is little confidence in quantifying of the present day distribution and burden of carbonaceous aerosol components (IPCC, 2021). Therefore, observational constraints are urgently needed.

Boreal wildfires occur every year in both North America and Eurasia. They are mainly ignited by people or lightning and their extent depends on proximity to populated areas, availability of wildfire mitigation resources, and meteorological conditions. As climate warms twice as fast in the boreal region as on average, the potential for wildfires and the consequent emissions will increase in the future (Descals et al., 2022). Several studies have been published regarding the long-range transport of smoke from boreal wildfires using a wide range of methods, such as remote sensing, in-situ observations and model simulations. For example, Markowicz et al. (2016a) and Markowicz et al. (2016b) analyzed the optical properties of Canadian smoke plumes that reached Central Europe in July 2013 and the European Arctic in July 2015, respectively. Sicard et al. (2019) reported the horizontal and vertical transport of a smoke plume from northern America to Europe during the 2017 record-breaking burning season. Johnson et al. (2021) used aerosol and trace gas data from a synergy of remote-sensing and in-situ observations, and model simulations, to assess the impact of emissions from Siberian wildfires on atmospheric chemical composition and air quality in North America. Boreal smoke plumes have also been studied widely using lidar observations, as for example Shang et al. (2021) and the references therein illustrate. Shang et al. (2021) analyzed a smoke plume that reached Kuopio, Finland on 4-6 June 2019 and found that well-calibrated ceilometers can be used to monitor smoke plumes and their aerosol mass concentrations. Furthermore, they reported that the global reanalysis model MERRA-2 (Buchard et al., 2017; Randles et al., 2017) had some difficulties in reproducing the smoke plumes.

As the above mentioned studies show, boreal fires are studied extensively. However, significant knowledge gaps still remain, especially related to the properties and amount of the smoke aerosol transported over long distances to pristine regions. Due to the vastness of the boreal region it cannot be covered with advanced ground-based based observations or flight campaigns. For secluded areas, space-borne remote sensing has the potential to provide useful information with a reasonable temporal

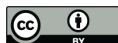

resolution. Furthermore, although passive satellite observations of aerosols are typically limited to their optical properties, with lidar measurements we are also able to estimate the mass of the aerosol layers (Shang et al., 2021).

To study the evolution of smoke aerosols during long-range transport, we analyzed the smoke plumes originating from Alberta, Canada at the end of May 2019. We used trajectory analysis to locate the plumes, and retrievals from the space-borne  
55 lidar CALIOP to study the properties of the smoke layers, concentrating on the mass of the aerosols. The smoke plumes were transported across North America, the North Atlantic and Europe. We compared the accuracy of the CALIOP mass retrievals with the accuracy of the ground-based lidars or ceilometer near the sources in North America and after the long-range transport in Europe. Finally, we compared the mass observations with simulated aerosol concentrations from two reanalysis models, MERRA-2 (Gelaro et al., 2017) and CAMS (Inness et al., 2019) and found clear discrepancies.

## 60 2 Materials and methods

### 2.1 May-June 2019 fire event in Canada

Starting at the end of May 2019 extensive wildfires occurred in North Canada producing massive amounts of smoke that got transported to Europe. This study concentrates on fires that occurred in Alberta at two sub-regions (longitude 114.9 to 113.9° W and latitude 55.5 to 56.5° N, longitude 118.2 to 117.0° W and latitude 56.8 to 58.7° N, Fig. 1). These regions were selected as  
65 back-trajectory analysis indicated that they were the main sources of the smoke plumes that reached Europe at the beginning of June. During that time Alberta had above average fire danger conditions due to severe drought. Three major wildfires, the largest being the Chuckegg Creek wildfire, ignited during May and burned throughout the summer. Overall, in Alberta there were fewer fires in 2019 than the 10-year average but the burned area of 883 414 hectares was significantly higher than the 10-year average of 242 660 hectares (<https://www.cifc.ca/sites/default/files/2020-07/Canada%20Report%202019.pdf>, last  
70 access: 22 August 2023).

To define the exact locations and intensity of fires, the MODIS Collection 6 Level-2 active fire product was used (Giglio et al., 2016). The fire radiative power (FRP) observations from both Aqua and Terra satellites were considered. FRP describes the radiant energy released per time unit by burning indicating the intensity of fires. Satellite-based carbon monoxide (CO) observations are a good proxy for assessing long-range transport of fire-related emissions. The TROPOMI (<https://www.tropomi.eu/>, last  
75 access: 22 August 2023) observations of CO on 3 June 2019, presented in Fig. 1, illustrate clearly that the emissions from the fires in Alberta were transported all the way to Europe.

The Alberta May 2019 wildfires have been used in many studies on newly developed methods for satellite-based applications of wildfire monitoring. Ban et al. (2020) and Zhang et al. (2021) developed machine-learning-based methods to monitor wildfire progression using space-borne synthetic aperture radars and optical instruments. Both works use the Alberta wildfires in their  
80 method evaluation. Furthermore, Tymstra et al. (2021) characterized the weather conditions for large Canadian spring wildfires including May 2019, whereas Whitman et al. (2022) studied the climate-related changes of wildfires in Alberta. Both Tymstra et al. (2021) and Whitman et al. (2022) concluded that climate change would make the wildfires larger and more intense in this region in the future.



## 2.2 Aerosol observations

### 85 2.2.1 CALIOP

The Cloud-Aerosol Lidar and Infrared Pathfinder Satellite Observation (CALIPSO) satellite (Winker et al., 2003; Vaughan et al., 2004) has been providing observations on aerosols and clouds since June 2006. CALIPSO carries the Cloud-Aerosol Lidar with Orthogonal Polarization (CALIOP) instrument, which measures the vertical structure of the atmosphere at two wavelengths: at 532 nm where it has two channels that are orthogonally polarized and at 1064 nm where it measures the total backscattered signal (Winker et al., 2007).

In this study both the profile and layer products were utilized to locate smoke layers and estimate their optical properties. From CALIPSO lidar data Level 2 V4.20 was used (which is the latest version of the data available at the time of data analysing). The data were downloaded from the Atmospheric Sciences Data Center (ASDC) located at the National Aeronautics and Space Administration (NASA) Langley Research Center (LaRC). The CALIOP aerosol classification algorithms were used for the identification of the smoke layers. The CALIOP tropospheric aerosol sub-type classification (Kim et al., 2018) uses integrated attenuated backscatter coefficient, depolarization ratio, surface type, altitude and location to assign the layer to one of the following aerosol classes: clean continental, clean marine, dust, dusty marine, polluted continental/smoke, polluted dust, and elevated smoke ([https://www-calipso.larc.nasa.gov/resources/calipso\\_users\\_guide/data\\_summaries/vfm/index\\_v420.php](https://www-calipso.larc.nasa.gov/resources/calipso_users_guide/data_summaries/vfm/index_v420.php), last access: 22 August 2023). The depolarization ratio is enhanced if the particles are non-spherical, thus it can be used to distinguish between, e.g. dust, and spherical aerosols.

In order to analyze only the most trustworthy observations, several quality control products were considered, and only nighttime measurements were used. The first criteria was that the cloud-aerosol discrimination (CAD) score had to be between -100 and -70, indicating high confidence of aerosol layers. Furthermore, only aerosol bins with the extinction quality control (QC) flags of 0, 1, 16, and 18 were used to ensure the good quality of the retrievals (Kim et al., 2018). In CALIOP observations smoke particles can be classified as "polluted continental/smoke" or "elevated smoke". In this study only "elevated smoke" were considered since the focus is on fire-emitted aerosols. The separation between polluted continental and smoke aerosols is not possible in the class "polluted continental/smoke".

### 2.2.2 Ground-based lidars and ceilometer

In order to evaluate the usability of CALIOP observations in the monitoring of aerosol mass in smoke plumes, we utilized open-access data from several ground-based lidar/ceilometer networks. The NASA Micro-Pulse Lidar Network (MPLNET) has been continuously providing aerosol and cloud properties, and the planetary boundary layer structures, at over 80 sites worldwide since 2000 (Welton et al., 2001). Currently, the observations from the polarized Micro-Pulse Lidar instruments are processed using the MPLNET Version 3 system (Welton et al., 2018). More information on MPLNET and data products are available on their website (<https://mplnet.gsfc.nasa.gov>, last access: 22 August 2023). For the European-based comparisons, besides MPLNET, observations submitted to the EU-funded Cloudnet project (Illingworth et al., 2007) and the polarization lidar network PollyNET (Baars et al., 2016) have been utilized. Cloudnet network enumerates 17 permanent and numerous



campaign stations across Europe, and observations are routinely collected, processed, visualized, and distributed through the ACTRIS Cloudnet data portal (<http://cloudnet.fmi.fi>, last access: 22 August 2023). PollyNET (<https://polly.tropos.de/>, last access: 22 August 2023) is utilizing the capabilities from multiwavelength polarization Raman lidars of type Polly (Althausen et al., 2009) to establish aerosol climatology. Observations from four stations were used in this study, which will be presented in Sect. 3.1: GSFC (NASA Goddard Space Flight Center) station (38.993°N, 76.840°W, 50 m asml, Washington DC, USA), and Barcelona station (41.386°N, 2.117°E, 125 m asml, Spain) of MPLNET; Granada station (37.164°N, 3.605°W, 680 m amsl, Spain) part of Cloudnet (Cazorla Cabrera and Alados-Arboledas, 2023); and Antikythera station (35.86°N, 23.31°E, 193 m amsl, Greece) member of PollyNET (Kampouri et al., 2021).

## 125 2.3 Models

### 2.3.1 MERRA-2 reanalysis aerosols

The Modern-Era Retrospective analysis for Research and Applications, Version 2 (MERRA-2) is NASA's global reanalysis model (Gelaro et al., 2017). It includes meteorological variables, as well as aerosols and trace gases. MERRA-2 assimilates bias-corrected AOD at 550 nm from various sources, including satellite-based MODIS aerosol products (Buchard et al., 2017; Randles et al., 2017).

The spatial resolution of MERRA-2 is  $0.5^\circ \times 0.625^\circ$  and it has 72 pressure levels. MERRA-2 provides data with 1-hour or 3-hour instantaneous or time-averaged time steps, depending on the variable, and data is available since 1980. In MERRA-2, aerosol output is written out every 3 hours and it produces vertical profiles of mass mixing ratios for five different aerosol species: dust, sea salt, black carbon, organic carbon, and sulphate. The daily emissions of biomass burning used in MERRA-2 come from the Quick Fire Emission Dataset (QFED) version 2.4-r6 (Darmenov and da Silva, 2015) (after 2010). Based on the FRP, the QFED implement the cloud correction method from the Global Fire Assimilation System (GFAS, Kaiser et al. (2012)), and applied a sophisticated treatment of emissions from non-observed land areas (Darmenov and da Silva, 2015).

In this study, we used the mass mixing ratios from the MERRA-2 assimilated aerosol mixing ratio data product `inst3_3d_aer_Nv` (Global Modeling and Assimilation Office (GMAO), 2015a). We used linear interpolation of MERRA-2 aerosol profile data to spatially collocate the model data with CALIOP profiles. For temporal collocation, we used the nearest timestep of the MERRA-2 aerosol data to match with CALIOP overpass.

### 2.3.2 CAMS reanalysis aerosols

The Copernicus Atmospheric Monitoring System (CAMS) Atmospheric Composition Reanalysis 4 (EAC4) is run by the European Centre for Medium-Range Weather Forecasts (ECMWF) (Inness et al., 2019). It consists of meteorological variables and also aerosol and trace gas information. CAMS reanalysis assimilates total AOD observations, including satellite data from MODIS (Rémy et al., 2019). The spatial resolution of CAMS reanalysis data products is  $0.75^\circ \times 0.75^\circ$  with 60 model levels. CAMS reanalysis provides aerosol data every 3 hours, and data is available since 2003. CAMS reanalysis provides vertical profiles of mass mixing ratios for five different aerosol species: organic matter, black carbon, sea salt, dust, and sulphate. Daily



biomass burning emissions derive from the GFAS (Flemming et al., 2015, 2017), which is based on the combined MODIS  
150 observations of FRP from Terra and Aqua (Kaiser et al., 2012).

The collocation of CAMS reanalysis aerosol profiles was carried out similarly as for MERRA-2 - linear interpolation for spatial collocation and the closest time instant for temporal collocation.

Daily fire injection height information was available using the CAMS GFAS which assimilates FRP observations and meteorological conditions simulated from the ECMWF operational weather forecast. In particular, the daily injection height (mean  
155 altitude of maximum injection and altitude of plume top) is estimated by the Plume Rise Model (PRM) and IS4FIRES (Sofiev et al., 2012). The GFAS injection height calculations are not used in the reanalysis, but were considered for the determination of the initial heights for the trajectories.

### 2.3.3 Trajectory model

In this study, we computed the air parcel trajectories using a custom Lagrangian trajectory model that moved the air parcels  
160 according to the MERRA-2 wind fields. The eastward and northward wind and vertical pressure velocity components from the MERRA-2 assimilated meteorological fields data product inst3\_3d\_asm\_Nv were used (Global Modeling and Assimilation Office (GMAO), 2015b). To get the wind components for the exact location and time of the air parcel, we linearly interpolated the MERRA-2 wind field information. We used a 5-minute time step and simple forward Euler method in our trajectory computations. The vertical pressure level of the air parcel was converted to heights using MERRA-2 pressure profile information.  
165 In the trajectory model, the air parcels were restricted from going below the surface elevation. When reaching the surface elevation, the air parcels were moved along the wind components at the surface level. The trajectory model only computed the transport of the air parcels and did not simulate any other processes such as mixing, chemical transformation, or deposition of particles.

## 2.4 Methods

### 170 2.4.1 Estimation of mass from lidar signals

It is possible to estimate the particle mass concentration profile from the vertical profile of lidar-derived backscatter coefficient, together with the particle mass density, the volume-to-extinction conversion factor, and the type-dependent lidar ratio. The method described in Shang et al. (2021) was applied here to estimate the mass concentrations based on the measured backscatter coefficients at 532 nm (or converted to 532 nm using the corresponding backscatter-related Ångström exponent).  
175 The conversion factor at 532 nm of  $0.16 \pm 0.01 \times 10^{-6}$  m for the fresh and medium-fresh smoke (i.e. less than 2 days), or  $0.13 \pm 0.01 \times 10^{-6}$  m for aged smoke, and a particle density of  $1.3 \text{ g cm}^{-3}$ , were used for the biomass burning particles (Ansmann et al., 2021). Using ground-based multi-wavelength lidar measurements, the lidar ratio at 532 nm and the backscatter-related Ångström exponent between 532 and 1064 nm were derived as  $71 \pm 5$  sr and  $2.2 \pm 0.3$ , respectively, for the smoke plumes during the same wildfire event as in this study (Shang et al., 2021). The Ångström value of 2.2 was applied to convert the





180 ceilometer measured backscatter coefficients at 1064 nm to 532 nm. This study employed a lidar ratio at 532 nm of 70 sr, which was the values used for the aerosol subtype of "elevated smoke" in CALIOP version 4 (Kim et al., 2018).

## 2.4.2 Selection of trajectories

6480 trajectories were generated considering originated from the same day (0 to 24 h), from all initial heights (0 to 7.5 km), and from both wildfire sub-regions (18 initial spots). The trajectory frequencies were used here to determine the dominant air mass pathway. The latitude and longitude trajectory frequencies were calculated based on  $1^\circ \times 1^\circ$  pixels, whereas the altitude and time trajectory frequencies were calculated based on 500 m x 1 h pixels. The pixels with a probability above the median value were selected, referring to the most possible air mass transportation. Only the trajectories included in the predefined pixels were kept. These screened trajectories were used to define 4-dimensional hypercubes, with a doubled resolutions as previously used for the frequency pixels, considering the model uncertainties. Each hypercube has eight values of four variables (i.e. the edge values of latitude, longitude, altitude and time). Next, the CALIOP-derived smoke layers (after the quality control, see Sect. 2.2.1) were automatically selected using these 4-D hypercubes to ensure that they are on the dominant air mass pathway.

## 3 Results and discussion

### 3.1 Comparison of CALIOP retrievals with ground-based lidars and ceilometer

Among the automatically selected CALIOP smoke layers, four cases were intensively analysed when nearby ground-based lidar/ceilometer observations were available.

**Case 1: GSFC (MPLNET).** On 3 June 2019, some lofted layers were detected by the ground-based lidar at GFSC station (<https://mplnet.gsfc.nasa.gov/data?v=V3&s=GSFC&t=20190603>, last access: 22 August 2023). Version 3 Level 1.5 aerosol data are only available after 9:40 UTC after the quality control. The closest CALIPSO track was passed at about 7:18 UTC. From CALIPSO VFM (Vertical Feature Mask) product (Fig. 2, 1st row, panel b), elevated smoke layers were detected at about 7-10 km for longitude from  $-75.5^\circ$  to  $-74.5^\circ$ E, whereas a dust layers were identified below at about 6 km. These two layers were also detected by the ground-based lidar (Fig. 2, 1st row, panel c). Particle backscatter coefficient of the smoke layer derived from the ground-based lidar is slightly higher than the one from CALIOP. Consequently, the layer mean mass derived from the ground-based lidar is 30 % higher than CALIOP estimate. The MPLNET and CALIOP layer mean masses are  $12.2 \pm 4.5 \mu\text{g m}^{-3}$  and  $8.5 \pm 4.6 \mu\text{g m}^{-3}$ , respectively. Note that there are about two and half hours difference between these two observations, the sampling smoke layer could be not the exact part of the plume.

**Case 2: Granada (Cloudnet).** On 6 June continuous lofted layers were detected by CALIOP for longitude from  $-7^\circ$  to  $-4.5^\circ$ E, for altitudes 5-8 km (Fig. 2, 2nd row, panel b). CALIPSO classified these layers as elevated smoke or polluted dust. Faint lofted layers were also visible in the morning from the near-real-time non-screened attenuated backscatter coefficients of the CHM15k ceilometer at Granada (<https://cloudnet.fmi.fi/file/155df385-c4b1-4cd0-b746-bab2afb31355>, last access: 22 August 2023). The smoke layer (at  $\sim 5$  to 7 km) was well detected by both instruments with a good agreement (Fig. 2, 2nd





row, panel c). The ceilometer-derived backscatter coefficients of the smoke layer measured at 1064 nm were used to estimate the layer mass concentrations following the method presented in Sect. 2.4.1, resulting a layer-mean value of  $6.6 \pm 3.7 \mu\text{g m}^{-3}$  compared to  $8.3 \pm 3.0 \mu\text{g m}^{-3}$  from CALIOP. Thus, in this comparison the CALIOP retrieval produces 26 % larger aerosol mass for the smoke layer.

215 **Case 3: Barcelona (MPLNET).** Only two smoke layers were identified by the CALIPSO on 8 June for the selected sector (Fig. 2, 3rd row, panel b). The one closer to the Barcelona station was selected in this section, ranging from about 3.5-5 km (a CALIOP horizontal averaging of 20 km was applied). The CALIOP ALay products of this smoke layer show an AOD of  $\sim 0.05$  and an estimated particulate depolarization ratio of  $\sim 0.02$  at 532 nm. Several layers up to 6 km were detected in the morning on that day by the ground-based lidar at Barcelona station (<https://mplnet.gsfc.nasa.gov/data?v=V3&s=Barcelona&t=20190608>,  
220 last access: 22 August 2023). The atmosphere was quite in-homogeneous, thus 1 min ground-based lidar profiles ~~was used to compared~~ with CALIOP-derived backscatter coefficient (Fig. 2, 3rd row, panel c), showing lower values in the smoke layer. Due to the lower backscatter coefficient, the ground-based estimate for layer mean mass ( $4.4 \pm 1.6 \mu\text{g m}^{-3}$ ) is 43 % smaller than the CALIOP estimate ( $6.3 \pm 2.1 \mu\text{g m}^{-3}$ ). The ground-based lidar-derived particle depolarization ratio of this layer is  $\sim 0.03 \pm 0.01$ .

225 **Case 4: Antikythera (PollyNET).** Faint smoke layers were identified by CALIOP for the considered sector on 8 June (Fig. 2, 4th row, panel b). The horizontal resolutions of 80 km ~~were applied to~~ these layers due to the small aerosol amount. The ground-based lidar at PANGEA observatory in Antikythera also observed the lofted layers ([https://polly.tropos.de/datavis/location/38/19/1?dates=\[2019-06-08T00:00:00,2019-06-09T00:00:00\]](https://polly.tropos.de/datavis/location/38/19/1?dates=[2019-06-08T00:00:00,2019-06-09T00:00:00]), last access: 22 August 2023). The backscatter coefficients derived from the ground-based lidar and CALIOP show good ~~consistency~~ (Fig. 2, 4th row, panel c). Two smoke layers located at about  
230 4.5 and 7.5 km, having AODs at 532 nm of about 0.017 and 0.014, respectively, and estimated particulate depolarization ratios of  $\sim 0.06$  (CALIOP ALay products). The ground-based lidar observed a thicker layer compared to CALIOP for the upper one. Some of the layers could not be fully detected by CALIOP, e.g. the thin aerosol layers with low concentrations, as well as the borders of layers where there are fewer aerosols. The estimate for the layer mean mass from the ground-based lidar ( $4.1 \pm 1.3 \mu\text{g m}^{-3}$ ) is 12 % larger than the CALIOP-retrieved estimate ( $3.6 \pm 1.3 \mu\text{g m}^{-3}$ ). Good agreements were also found for the  
235 aerosols inside the boundary layer (i.e. below 3 km), which were classified as dust and dusty-marine by CALIOP.

### 3.2 Analysis of the Alberta plume event

During the wildfire event, highest fire emissions were detected on 29-31 May (Fig. 1). Following the method described in Sect. 2.4.2, the CALIOP smoke layers on the dominant air mass pathway originating from same day were automatically selected. Their location and time-height information is shown in Fig. 3. In total, 1336 smoke layers were selected, related to 1194  
240 CALIOP 5km profiles. The largest number of auto-selected layers was found originating from 29 May, thus, more intense investigation was performed for these layers, and the trajectory frequencies from 29 May were used as the colored background in Fig. 3. Smoke layers observed on the same day were grouped, and were related to the age of the smoke particles, for the illustration of the evolution of the particle properties during the transportation (Fig. 4). The CALIPSO Level 2 5km aerosol layer (ALay) products are used here. Note that the optical depths were summed up (denoted as AOD here) in case there are



245 several smoke layers detected in the same profile (Fig. 4a). A clear tendency of AOD and mass decreasing can be seen in Fig. 4a-b. The median values of AOD (or layer-mean mass concentration) was decreased from 0.25 ( $56 \mu\text{g m}^{-3}$ ) for the fresh smoke ( $\sim 1\text{d}$  aged) to 0.013 ( $4.5 \mu\text{g m}^{-3}$ ) for the aged smoke after the long-range transportation ( $\sim 10\text{d}$  aged). The higher decreasing rate was found at the beginning of transportation. Slight increase on AODs and mass concentrations were observed in the middle of the transportation over ocean; these smoke layers were probably a mixture of smoke particles originating from several fire source days (as shown by overlapped symbols in Fig. 3, e.g. CALIPSO track 06-02T04-57). Taylor et al. (2014) reported the mass concentrations of organic aerosol and black carbon in the same range for smoke plumes of  $\sim 1\text{-}2$  day after passing over the fires source, unaffected by the wet deposition (precipitation). The estimated particulate depolarization ratio at 532 nm of the smoke layers slightly increased during the transportation, with median values from 0.03 to 0.06 (Fig. 4c). There is no clear tendency on the relative humidity (Fig. 4d). A decreasing tendency was also found for the total attenuated backscatter color ratio (the ratio of attenuated backscatters at 1064 and 532 nm), which is an independent quantity as not being used in the subtyping algorithm in the troposphere (Omar et al., 2009). Nevertheless, this parameter is modulated by the scattering ratio and is therefore not a direct indicator of particle size. No clear tendency was found for the particulate backscatter color ratio. Smoke layer altitudes were increased at the beginning, then split into two air mass paths (e.g. on 1 June). Layer heights decreased a bit over the oceans, then climb up again over Europe (Fig. 3). The depths of these smoke layers range from 0.30 to 260 1.44 km with a mean value of  $0.68 \pm 0.26$  km.

For better illustration, one profile from CALIPSO APro products was selected on each day, so as to present the time evolution using the vertical profiles of backscatter coefficients (Fig. 5). The profiles locations are given in Fig. 3, whereas the smoke layers' AOD are given in Fig. 4a. CALIPSO algorithm applied different horizontal averaging regarding the signal to noise ratio of the aerosol layer.

### 265 3.3 Comparison of observed and simulated smoke layers

As was discussed in Sect. 3.1 and shown in Fig. 2, mass retrievals from CALIOP agreed well with ground-based lidar/ceilometer retrievals. To evaluate if models could also capture these plumes, the CALIOP retrievals were compared with aerosol mass concentration profiles from the reanalysis models MERRA-2 and CAMS. These comparisons are presented in Fig. 2, panels e and f. Based on these case studies, MERRA-2 appears to have higher aerosol concentrations than CAMS at the altitudes of the smoke layers. Consequently, MERRA-2 seems to agree better with the CALIOP mass retrievals. However, when the contribution of different aerosol types is considered, it is clear that MERRA-2 produces more comparable aerosol concentrations because it is overestimating the contribution of dust. Recently, Li et al. (2023) reported a quantitative evaluation analysis, showing that the dust products from MERRA-2 reanalysis have higher column concentrations than the satellite-based component retrievals, with relative differences of about 20 to 70%. The comparison at GSFC implies that CAMS is better at simulating 275 lofted smoke layers near the source regions as it includes elevated OC concentrations at higher altitudes. However, the elevated OC concentrations are located between 1 and 8 km, whereas CALIOP retrieval shows that the smoke plume was mainly above 8 km. Overall, these case studies indicate that reanalysis models have difficulties in capturing the location and properties of



long-range transported smoke. In fact, the difficulties in representing the aerosol altitude is generally true of most models, as stated in Das et al. (2017), Zhong et al. (2022) and references therein.

280 In order to obtain a more complete picture of the performance of these models, a comparison using all the smoke layers within the transported plume was carried out. As a first step, the total column was considered. The CALIOP profiles with presence of layers which did not fulfill the QC were excluded, reducing the profile number to 622.

Simulated and observed total column AODs were compared with each other. The CALIOP AOD is calculated only from tropospheric aerosols and based on the analysis of CALIOP layer products, as the stratospheric contribution is insignificant  
285 during the studied cases. These comparisons are presented in the 1st row of Fig. 6 as scatterplots, and of Fig. 7 as the histograms of the differences. CAMS and MERRA-2 exhibit good agreement in their AOD values. However, when compared with the CALIOP observations, clear differences emerge. CALIOP AODs tend to be smaller than the simulated values and even though the values are positively correlated, there is significant variability. Consequently, the correlation coefficients are only 0.64 and 0.62 for CAMS and MERRA-2, respectively. The fact that bias in reanalysis AOD is unavoidable must be noted, as stated by  
290 several studies (Mukkavilli et al., 2019; Song et al., 2018; Salamalikis et al., 2021; Gueymard and Yang, 2020). Furthermore, some aerosol layers could not be fully detected by CALIOP due to the weak signal to noise ratio as discussed in Sect. 3.1.

The column mass concentrations of smoke were also compared, shown as the 2nd row in Fig. 6 and Fig. 7. The CALIOP elevated smoke layers were combined in each profile to estimate the smoke mass concentrations. Furthermore, only OC and BC masses were considered in the calculation of the simulated smoke masses. High correlation was found for the simulated  
295 smoke column mass concentrations for CAMS and MERRA-2. However, CAMS simulated higher smoke concentrations than MERRA-2. When compared with CALIOP products, the correlation coefficients are quite similar as the ones for AODs. These column smoke mass concentrations were also presented in Fig. 8 to illustrate the smoke transportation. Mass burden decrease can be clearly seen from west (closer to the source) to east (far from the source), corresponding to the fresh to old aged smoke particles. The models exhibit a clearer contrast between the continents than CALIOP which indicates that the smoke aerosols  
300 in the models could be removed too efficiently.

The accuracy of the simulated smoke layers were compared in a similar fashion using the integrated aerosol mass of the layers. As the models might have the smoke layers at slightly different altitudes than in the observations, the collocation criteria were relaxed by assuming that the thickness of the simulated layer was three times larger than in the observations. As an example, if CALIOP had observed a 1-km thick smoke layer at the altitude of 4 km, the simulated layer was assumed to be  
305 centered at the same altitude but its thickness was set to be 3 km. These comparisons are presented as the 3rd row in Fig. 6 and Fig. 7. In this comparison, the models do not agree so well with each other. Moreover, the modeled concentrations are lower than the CALIOP-based concentrations. These results highlight the difficulty in simulating biomass burning plumes: both of these reanalysis models have difficulties in reproducing the location, altitude, layer depth, and aerosol concentration of the plumes.



#### 310 4 Conclusions

In May and June 2019, smoke plumes from Canadian wildfires were advected all the way (across North America and the North Atlantic) to Europe. To analyze the evolution of the plumes and to estimate the amount of smoke aerosols transported to Europe, retrievals from the space-borne lidar CALIOP were used. Mass retrievals from CALIOP were in good agreement with retrievals from ground-based lidars, independently from the distance to the source. Over North America the CALIOP layer mean mass concentration was 30 % smaller than the ground-based estimate (with about 2.5 hour time gap), whereas over Southern Europe that difference varied between 12 % and 43 %. These comparisons indicate that CALIOP data, as well as current (e.g. DQ2 of CNSA, <https://www.cnsa.gov.cn/>, last access: 22 August 2023) and upcoming (e.g. EarthCARE, <https://earth.esa.int/eogateway/missions/earthcare>; Aeolus-2, [https://www.esa.int/ESA\\_Multimedia/Images/2022/10/Aeolus-2\\_Value\\_of\\_Information](https://www.esa.int/ESA_Multimedia/Images/2022/10/Aeolus-2_Value_of_Information); AOS, <https://aos.gsfc.nasa.gov/home.htm>; last access: 22 August 2023) satellite missions with the capability to provide lidar measurements of backscatter coefficient and depolarization ratio, could be used to estimate aerosol masses in remote regions where ground-based observations are not available.

The analysis of aerosol mass concentrations over North America and Europe showed that less than one tenth of the emitted mass survived the transport over the Atlantic Ocean. This information is valuable for evaluating transport efficiency in atmospheric models. The comparisons with reanalysis models MERRA-2 and CAMS showed that both models have difficulties in representing the aerosol mass of the studied smoke plumes, especially, when the aerosol composition is taken into account. For example, the aerosol mass profiles in MERRA-2 matched quite well the smoke layers observed with CALIOP but most of the mass in the simulation originated from dust, not organic or black carbon as one would expect for smoke plumes. Consequently, reanalysis simulations should be taken cautiously in the analysis of long-range transported smoke in the boreal region.

These findings indicate that in order to estimate the transport and deposition of smoke aerosols to remote and pristine regions, high-quality observations are still needed. Passive satellite instruments can provide extensive spatial coverage, but they are incapable of accurately provide the altitude of the elevated plumes, and their accuracy starts to suffer over polar regions because of non-optimal measurement geometry. Space-borne lidars are limited in spatial coverage, but the coverage improves closer to the poles. Furthermore, lidars can provide information on the vertical location and extent of the aerosol plumes which is invaluable for impact studies and model development. The increasing wildfire activity produces a complicated global layering of smoke sub-types (fresh to aged), with emitted plumes from various stages from the burning phase (which impact the emissions). Even within the category of “smoke”, the properties of the aerosols can vary widely, especially when they linger in the Northern Hemisphere for weeks to months. Besides, other aerosols may also be mixed in the smoke plumes. For example, the Raikoke volcanic eruption in 2019 occurred only about 2 weeks after the Alberta plume event analyzed in this study; mixtures of smoke and volcanic plumes were present in the atmosphere for many weeks. These increasingly complex problems affect nearly the entire Northern Hemisphere every year. That demonstrates the need to continue deploying space-borne lidars and ground-based lidar and ceilometer networks, and especially those with enhanced capabilities which provide more accurate results and the ability to retrieve microphysical properties of the layers. There will be an observational gap once CALIPSO ends its life, and during the absence of the upcoming space-borne lidar missions. This study points to the



urgent need for future lidar missions in space, as well as the need of near-real-time open access provision of space-borne lidar  
345 measurements. In addition, it would be good to study in the future how operational aerosol forecasts rather than reanalysis  
perform for long-range transport including for the boreal regions and the Arctic.

*Data availability.* The CALIPSO data were obtained from the NASA Langley Research Center Atmospheric Science Data Center (<https://subset.larc.nasa.gov/calipso/>, last access: 22 August 2023). MERRA-2 data are available at MDISC <https://disc.gsfc.nasa.gov/datasets?project=MERRA-2> (last access: 22 August 2023), managed by the NASA Goddard Earth Sciences (GES) Data and Information Services  
350 Center (DISC). The CAMS data are available at the Atmosphere Data Store at <https://ads.atmosphere.copernicus.eu/> (last access: 22 August 2023). MPLNET data are available at [https://mplnet.gsfc.nasa.gov/download\\_tool/](https://mplnet.gsfc.nasa.gov/download_tool/) (last access: 22 August 2023). Visualization of lidar products of PollyNet are available at <https://polly.tropos.de/> (last access: 22 August 2023), lidar data are available upon request. Ceilometer data are available through Cloudnet <https://cloudnet.fmi.fi/> (last access: 22 August 2023).

*Author contributions.* XS: Conceptualization, Methodology, Software, Formal analysis, Writing — Original draft, Visualization. AL: Con-  
355 ceptualization, Software, Formal analysis, Writing — Original draft. MF: Conceptualization, Writing — Original draft. AS: Conceptualiza-  
tion, Writing — Original draft. MP: Data curation, Writing — Review and editing. VB: Data curation, Writing — Review and editing. AD:  
Data curation, Writing — Review and editing. EW: Data curation, Writing — Review and editing. EM: Data curation, Writing — Review  
and editing. VA: Data curation, Writing — Review and editing. MS: Data curation, Writing — Review and editing. ARG: Data curation,  
Writing — Review and editing. MK: Data curation, Writing — Review and editing. TM: Conceptualization, Project administration, Writing  
360 — Original draft.

*Competing interests.* The authors declare that they have no conflict of interest.

*Acknowledgements.* This work was supported by the Academy of Finland [grant number 339885], and the Atmosphere and Climate Com-  
petence Center ACCC Flagship, funded by the Academy of Finland [grant number 337552]. EW and the MPLNET project are funded by  
the NASA Radiation Sciences Program and Earth Observing System. This research was supported by data and services obtained from the  
365 PANhellenic Geophysical Observatory of Antikythera (PANGEA) of the National Observatory of Athens (NOA). EM was supported by  
the PANGEA4CalVal project [Grant Agreement 101079201] funded by the European Union. VA acknowledges the the Hellenic Founda-  
tion for Research and Innovation (Project Acronym: StratoFIRE, Project Number: 3995). MS was supported by the REALISTIC project  
[Grant Agreement 101086690] funded by the European Union. ARG was supported by the Agencia Estatal de Investigación [grant number  
PID2019-103886RB-I00], the H2020 Environment [grant numbers 871115 and 101008004] and the H2020 Excellent Science [grant number  
370 778349] programs. We acknowledge ACTRIS, University of Granada, and the Finnish Meteorological Institute for providing the data set  
which is available for download from <https://cloudnet.fmi.fi/>. We acknowledge PollyNET for the data collection, calibration, processing and  
dissemination. We thank M\_Map for the open source code for the map plots used in this paper (Pawlowicz, R., 2020. "M\_Map: A map-

<https://doi.org/10.5194/egusphere-2023-1945>  
Preprint. Discussion started: 15 September 2023  
© Author(s) 2023. CC BY 4.0 License.

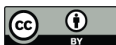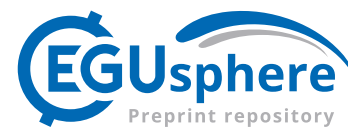

ping package for MATLAB", version 1.4m, [Computer software], available online at [www.eoas.ubc.ca/~rich/map.html](http://www.eoas.ubc.ca/~rich/map.html)). The authors wish to acknowledge CSC – IT Center for Science, Finland, for computational resources.



## 375 References

- Althausen, D., Engelmann, R., Baars, H., Heese, B., Ansmann, A., Müller, D., and Komppula, M.: Portable Raman Lidar PollyXT for Automated Profiling of Aerosol Backscatter, Extinction, and Depolarization, *Journal of Atmospheric and Oceanic Technology*, 26, 2366–2378, <https://doi.org/10.1175/2009JTECHA1304.1>, 2009.
- Ansmann, A., Ohneiser, K., Mamouri, R.-E., Knopf, D. A., Veselovskii, I., Baars, H., Engelmann, R., Foth, A., Jimenez, C., Seifert, P., and Barja, B.: Tropospheric and stratospheric wildfire smoke profiling with lidar: mass, surface area, CCN, and INP retrieval, *Atmospheric Chemistry and Physics*, 21, 9779–9807, <https://doi.org/10.5194/acp-21-9779-2021>, 2021.
- Baars, H., Kanitz, T., Engelmann, R., Althausen, D., Heese, B., Komppula, M., Preißler, J., Tesche, M., Ansmann, A., Wandinger, U., Lim, J.-H., Ahn, J. Y., Stachlewska, I. S., Amiridis, V., Marinou, E., Seifert, P., Hofer, J., Skupin, A., Schneider, F., Bohlmann, S., Foth, A., Bley, S., Pfüller, A., Giannakaki, E., Lihavainen, H., Viisanen, Y., Hooda, R. K., Pereira, S. N., Bortoli, D., Wagner, F., Mattis, I., Janicka, L., Markowicz, K. M., Achtert, P., Artaxo, P., Pauliquevis, T., Souza, R. A. F., Sharma, V. P., van Zyl, P. G., Beukes, J. P., Sun, J., Rohwer, E. G., Deng, R., Mamouri, R.-E., and Zamorano, F.: An overview of the first decade of Polly<sup>NET</sup>: an emerging network of automated Raman-polarization lidars for continuous aerosol profiling, *Atmospheric Chemistry and Physics*, 16, 5111–5137, <https://doi.org/10.5194/acp-16-5111-2016>, 2016.
- Ban, Y., Zhang, P., Nascetti, A., Bevington, A. R., and Wulder, M. A.: Near real-time wildfire progression monitoring with Sentinel-1 SAR time series and deep learning, *Scientific reports*, 10, 1322, <https://doi.org/10.1038/s41598-019-56967-x>, 2020.
- Buchard, V., Randles, C. A., da Silva, A. M., Darmenov, A., Colarco, P. R., Govindaraju, R., Ferrare, R., Hair, J., Beyersdorf, A. J., Ziemba, L. D., and Yu, H.: The MERRA-2 Aerosol Reanalysis, 1980 Onward. Part II: Evaluation and Case Studies, *Journal of Climate*, 30, 6851–6872, <https://doi.org/10.1175/JCLI-D-16-0613.1>, 2017.
- Cazorla Cabrera, A. and Alados-Arboledas, L.: Lidar data from Grenada on 6 June 2019, <https://hdl.handle.net/21.12132/1.155df385c4b14cd0>, 2023.
- Darmenov, A. S. and da Silva, A.: The Quick Fire Emissions Dataset (QFED): Documentation of versions 2.1, 2.2 and 2.4, Tech. rep., NASA Global Modeling and Assimilation Office, <https://gmao.gsfc.nasa.gov/pubs/docs/Darmenov796.pdf>, 2015.
- Das, S., Harshvardhan, H., Bian, H., Chin, M., Curci, G., Protonotariou, A. P., Mielonen, T., Zhang, K., Wang, H., and Liu, X.: Biomass burning aerosol transport and vertical distribution over the South African-Atlantic region, *Journal of Geophysical Research: Atmospheres*, 122, 6391–6415, <https://doi.org/https://doi.org/10.1002/2016JD026421>, 2017.
- Descals, A., Gaveau, D. L. A., Verger, A., Sheil, D., Naito, D., and Peñuelas, J.: Unprecedented fire activity above the Arctic Circle linked to rising temperatures, *Science*, 378, 532–537, <https://doi.org/10.1126/science.abn9768>, 2022.
- Flemming, J., Huijnen, V., Arteta, J., Bechtold, P., Beljaars, A., Blechschmidt, A.-M., Diamantakis, M., Engelen, R. J., Gaudel, A., Inness, A., Jones, L., Josse, B., Katragkou, E., Marecal, V., Peuch, V.-H., Richter, A., Schultz, M. G., Stein, O., and Tsikerdekis, A.: Tropospheric chemistry in the Integrated Forecasting System of ECMWF, *Geoscientific Model Development*, 8, 975–1003, <https://doi.org/10.5194/gmd-8-975-2015>, 2015.
- Flemming, J., Benedetti, A., Inness, A., Engelen, R. J., Jones, L., Huijnen, V., Remy, S., Parrington, M., Suttie, M., Bozzo, A., Peuch, V.-H., Akritidis, D., and Katragkou, E.: The CAMS interim Reanalysis of Carbon Monoxide, Ozone and Aerosol for 2003–2015, *Atmospheric Chemistry and Physics*, 17, 1945–1983, <https://doi.org/10.5194/acp-17-1945-2017>, 2017.
- Gelaro, R., McCarty, W., Suárez, M. J., Todling, R., Molod, A., Takacs, L., Randles, C. A., Darmenov, A., Bosilovich, M. G., Reichle, R., Wargan, K., Coy, L., Cullather, R., Draper, C., Akella, S., Buchard, V., Conaty, A., da Silva, A. M., Gu, W., Kim, G.-K., Koster, R.,





- Lucchesi, R., Merkova, D., Nielsen, J. E., Partyka, G., Pawson, S., Putman, W., Rienecker, M., Schubert, S. D., Sienkiewicz, M., and Zhao, B.: The Modern-Era Retrospective Analysis for Research and Applications, Version 2 (MERRA-2), *Journal of Climate*, 30, 5419 – 5454, <https://doi.org/10.1175/JCLI-D-16-0758.1>, 2017.
- 415 Giglio, L., Schroeder, W., and Justice, C.: The collection 6 MODIS active fire detection algorithm and fire products, *Remote Sensing of Environment*, 178, 31–41, <https://doi.org/10.1016/j.rse.2016.02.054>, 2016.
- Global Modeling and Assimilation Office (GMAO): MERRA-2 inst3\_3d\_aer\_Nv: 3d,3-Hourly,Instantaneous,Model-Level,Assimilation,Aerosol Mixing Ratio V5.12.4, Greenbelt, MD, USA, Goddard Earth Sciences Data and Information Services Center (GES DISC) [data set], <https://doi.org/10.5067/LTVB4GPCOTK2>, 2015a.
- 420 Global Modeling and Assimilation Office (GMAO): MERRA-2 inst3\_3d\_asm\_Nv: 3d,3-Hourly,Instantaneous,Model-Level,Assimilation,Assimilated Meteorological Fields V5.12.4, Greenbelt, MD, USA, Goddard Earth Sciences Data and Information Services Center (GES DISC) [data set], <https://doi.org/10.5067/WWQSXQ8IVFW8>, 2015b.
- Gueymard, C. A. and Yang, D.: Worldwide validation of CAMS and MERRA-2 reanalysis aerosol optical depth products using 15 years of AERONET observations, *Atmospheric Environment*, 225, 117 216, <https://doi.org/https://doi.org/10.1016/j.atmosenv.2019.117216>, 2020.
- 425 Illingworth, A. J., Hogan, R. J., O'Connor, E., Bouniol, D., Brooks, M. E., Delanoé, J., Donovan, D. P., Eastment, J. D., Gaussiat, N., Goddard, J. W. F., Haefelin, M., Baltink, H. K., Krasnov, O. A., Pelon, J., Piriou, J.-M., Protat, A., Russchenberg, H. W. J., Seifert, A., Tompkins, A. M., van Zadelhoff, G.-J., Vinit, F., Willén, U., Wilson, D. R., and Wrench, C. L.: Cloudnet: Continuous Evaluation of Cloud Profiles in Seven Operational Models Using Ground-Based Observations, *Bulletin of the American Meteorological Society*, 88, 883 – 898, <https://doi.org/10.1175/BAMS-88-6-883>, 2007.
- 430 Inness, A., Ades, M., Agustí-Panareda, A., Barré, J., Benedictow, A., Blechschmidt, A.-M., Dominguez, J. J., Engelen, R., Eskes, H., Flemming, J., Huijnen, V., Jones, L., Kipling, Z., Massart, S., Parrington, M., Peuch, V.-H., Razinger, M., Remy, S., Schulz, M., and Suttie, M.: The CAMS reanalysis of atmospheric composition, *Atmospheric Chemistry and Physics*, 19, 3515–3556, <https://doi.org/10.5194/acp-19-3515-2019>, 2019.
- IPCC: Climate Change 2021: The Physical Science Basis. Contribution of Working Group I to the Sixth Assessment Report of the Intergovernmental Panel on Climate Change, vol. In Press, Cambridge University Press, Cambridge, United Kingdom and New York, NY, USA, <https://doi.org/10.1017/9781009157896>, 2021.
- 435 Johnson, M. S., Strawbridge, K., Knowland, K. E., Keller, C., and Travis, M.: Long-range transport of Siberian biomass burning emissions to North America during FIREX-AQ, *Atmospheric Environment*, 252, 118 241, <https://doi.org/https://doi.org/10.1016/j.atmosenv.2021.118241>, 2021.
- 440 Kaiser, J. W., Heil, A., Andreae, M. O., Benedetti, A., Chubarova, N., Jones, L., Morcrette, J.-J., Razinger, M., Schultz, M. G., Suttie, M., and van der Werf, G. R.: Biomass burning emissions estimated with a global fire assimilation system based on observed fire radiative power, *Biogeosciences*, 9, 527–554, <https://doi.org/10.5194/bg-9-527-2012>, 2012.
- Kampouri, A., Amiridis, V., Solomos, S., Gialitaki, A., Marinou, E., Spyrou, C., Georgoulas, A. K., Akritidis, D., Papagiannopoulos, N., Mona, L., Scollo, S., Tsihla, M., Tsikoudi, I., Pytharoulis, I., Karacostas, T., and Zanis, P.: Investigation of Volcanic Emissions in the Mediterranean: “The Etna–Antikythera Connection”, *Atmosphere*, 12, <https://doi.org/10.3390/atmos12010040>, 2021.
- 445 Kim, M.-H., Omar, A. H., Tackett, J. L., Vaughan, M. A., Winker, D. M., Trepte, C. R., Hu, Y., Liu, Z., Poole, L. R., Pitts, M. C., Kar, J., and Magill, B. E.: The CALIPSO version 4 automated aerosol classification and lidar ratio selection algorithm, *Atmospheric Measurement Techniques*, 11, 6107–6135, <https://doi.org/10.5194/amt-11-6107-2018>, 2018.



- Li, L., Che, H., Su, X., Zhang, X., Gui, K., Zheng, Y., Zhao, H., Zhao, H., Liang, Y., Lei, Y., Zhang, L., Zhong, J., Wang, Z., and Zhang, X.: Quantitative Evaluation of Dust and Black Carbon Column Concentration in the MERRA-2 Reanalysis Dataset Using Satellite-Based Component Retrievals, *Remote Sensing*, 15, <https://doi.org/10.3390/rs15020388>, 2023.
- Markowicz, K., Chilinski, M., Lisok, J., Zawadzka, O., Stachlewska, I., Janicka, L., Rozwadowska, A., Makuch, P., Pakszys, P., Zielinski, T., Petelski, T., Posyniak, M., Pietruczuk, A., Szkop, A., and Westphal, D.: Study of aerosol optical properties during long-range transport of biomass burning from Canada to Central Europe in July 2013, *Journal of Aerosol Science*, 101, 156–173, <https://doi.org/https://doi.org/10.1016/j.jaerosci.2016.08.006>, 2016a.
- Markowicz, K. M., Pakszys, P., Ritter, C., Zielinski, T., Udisti, R., Cappelletti, D., Mazzola, M., Shiobara, M., Xian, P., Zawadzka, O., et al.: Impact of North American intense fires on aerosol optical properties measured over the European Arctic in July 2015, *Journal of Geophysical Research: Atmospheres*, 121, 14–487, <https://doi.org/10.1002/2016JD025310>, 2016b.
- Mukavilli, S., Prasad, A., Taylor, R., Huang, J., Mitchell, R., Troccoli, A., and Kay, M.: Assessment of atmospheric aerosols from two reanalysis products over Australia, *Atmospheric Research*, 215, 149–164, <https://doi.org/https://doi.org/10.1016/j.atmosres.2018.08.026>, 2019.
- Omar, A. H., Winker, D. M., Vaughan, M. A., Hu, Y., Trepte, C. R., Ferrare, R. A., Lee, K.-P., Hostetler, C. A., Kittaka, C., Rogers, R. R., Kuehn, R. E., and Liu, Z.: The CALIPSO Automated Aerosol Classification and Lidar Ratio Selection Algorithm, *Journal of Atmospheric and Oceanic Technology*, 26, 1994 – 2014, <https://doi.org/https://doi.org/10.1175/2009JTECHA1231.1>, 2009.
- Randles, C. A., da Silva, A. M., Buchard, V., Colarco, P. R., Darmenov, A., Govindaraju, R., Smirnov, A., Holben, B., Ferrare, R., Hair, J., Shinozuka, Y., and Flynn, C. J.: The MERRA-2 Aerosol Reanalysis, 1980 Onward. Part I: System Description and Data Assimilation Evaluation, *Journal of Climate*, 30, 6823 – 6850, <https://doi.org/10.1175/JCLI-D-16-0609.1>, 2017.
- Rémy, S., Kipling, Z., Flemming, J., Boucher, O., Nabat, P., Michou, M., Bozzo, A., Ades, M., Huijnen, V., Benedetti, A., Engelen, R., Peuch, V.-H., and Morcrette, J.-J.: Description and evaluation of the tropospheric aerosol scheme in the European Centre for Medium-Range Weather Forecasts (ECMWF) Integrated Forecasting System (IFS-AER, cycle 45R1), *Geoscientific Model Development*, 12, 4627–4659, <https://doi.org/10.5194/gmd-12-4627-2019>, 2019.
- Rogers, B., Soja, A., Goulden, M., and Randerson, J.: Influence of tree species on continental differences in boreal fires and climate feedbacks, *Nature Geosciences*, 8, 228–234, <https://doi.org/10.1038/ngeo2352>, 2015.
- Salamalikis, V., Vamvakas, I., Blanc, P., and Kazantzidis, A.: Ground-based validation of aerosol optical depth from CAMS re-analysis project: An uncertainty input on direct normal irradiance under cloud-free conditions, *Renewable Energy*, 170, 847–857, <https://doi.org/https://doi.org/10.1016/j.renene.2021.02.025>, 2021.
- Shang, X., Mielonen, T., Lipponen, A., Giannakaki, E., Leskinen, A., Buchard, V., Darmenov, A. S., Kukkurainen, A., Arola, A., O’Connor, E., Hirsikko, A., and Komppula, M.: Mass concentration estimates of long-range-transported Canadian biomass burning aerosols from a multi-wavelength Raman polarization lidar and a ceilometer in Finland, *Atmospheric Measurement Techniques*, 14, 6159–6179, <https://doi.org/10.5194/amt-14-6159-2021>, 2021.
- Sicard, M., Granados-Muñoz, M., Alados-Arboledas, L., Barragán, R., Bedoya-Velásquez, A., Benavent-Oltra, J., Bortoli, D., Comerón, A., Córdoba-Jabonero, C., Costa, M., del Águila, A., Fernández, A., Guerrero-Rascado, J., Jorba, O., Molero, F., Muñoz-Porcar, C., Ortiz-Amezcuca, P., Papagiannopoulos, N., Potes, M., Pujadas, M., Rocadenbosch, F., Rodríguez-Gómez, A., Román, R., Salgado, R., Salgueiro, V., Sola, Y., and Yela, M.: Ground/space, passive/active remote sensing observations coupled with particle dispersion modelling to understand the inter-continental transport of wildfire smoke plumes, *Remote Sensing of Environment*, 232, 111 294, <https://doi.org/10.1016/j.rse.2019.111294>, 2019.



- Sofiev, M., Ermakova, T., and Vankevich, R.: Evaluation of the smoke-injection height from wild-land fires using remote-sensing data, *Atmospheric Chemistry and Physics*, 12, 1995–2006, <https://doi.org/10.5194/acp-12-1995-2012>, 2012.
- 490 Song, Z., Fu, D., Zhang, X., Wu, Y., Xia, X., He, J., Han, X., Zhang, R., and Che, H.: Diurnal and seasonal variability of PM<sub>2.5</sub> and AOD in North China plain: Comparison of MERRA-2 products and ground measurements, *Atmospheric Environment*, 191, 70–78, <https://doi.org/https://doi.org/10.1016/j.atmosenv.2018.08.012>, 2018.
- Taylor, J. W., Allan, J. D., Allen, G., Coe, H., Williams, P. I., Flynn, M. J., Le Breton, M., Muller, J. B. A., Percival, C. J., Oram, D., Forster, G., Lee, J. D., Rickard, A. R., Parrington, M., and Palmer, P. I.: Size-dependent wet removal of black carbon in Canadian biomass burning plumes, *Atmospheric Chemistry and Physics*, 14, 13 755–13 771, <https://doi.org/10.5194/acp-14-13755-2014>, 2014.
- 495 Tymstra, C., Jain, P., and Flannigan, M. D.: Characterisation of initial fire weather conditions for large spring wildfires in Alberta, Canada, *International journal of wildland fire*, 30, 823–835, <https://doi.org/10.1071/WF21045>, 2021.
- Vaughan, M. A., Young, S. A., Winker, D. M., Powell, K. A., Omar, A. H., Liu, Z., Hu, Y., and Hostetler, C. A.: Fully automated analysis of space-based lidar data: an overview of the CALIPSO retrieval algorithms and data products, in: *Laser Radar Techniques for Atmospheric Sensing*, edited by Singh, U. N., vol. 5575, pp. 16 – 30, International Society for Optics and Photonics, SPIE, <https://doi.org/10.1117/12.572024>, 2004.
- 500 Welton, E. J., Campbell, J. R., Spinhirne, J. D., and III, V. S. S.: Global monitoring of clouds and aerosols using a network of micropulse lidar systems, in: *Lidar Remote Sensing for Industry and Environment Monitoring*, edited by Singh, U. N., Asai, K., Ogawa, T., Singh, U. N., Itabe, T., and Sugimoto, N., vol. 4153, pp. 151 – 158, International Society for Optics and Photonics, SPIE, <https://doi.org/10.1117/12.417040>, 2001.
- 505 Welton, E. J., Stewart, S. A., Lewis, J. R., Belcher, L. R., Campbell, J. R., and Lolli, S.: Status of the NASA Micro Pulse Lidar Network (MPLNET): overview of the network and future plans, new version 3 data products, and the polarized MPL, *EPJ Web Conf.*, 176, 09 003, <https://doi.org/10.1051/epjconf/201817609003>, 2018.
- Whitman, E., Parks, S. A., Holsinger, L. M., and Parisien, M.-A.: Climate-induced fire regime amplification in Alberta, Canada, *Environmental Research Letters*, 17, 055 003, <https://doi.org/10.1088/1748-9326/ac60d6>, 2022.
- 510 Winker, D. M., Pelon, J., and McCormick, P. M.: The CALIPSO mission: Spaceborne lidar for observation of aerosols and clouds, *Proc. SPIE 4893, Lidar Remote Sensing for Industry and Environment Monitoring III*, 4893, 1–11, <https://doi.org/10.1117/12.466539>, 2003.
- Winker, D. M., Hunt, W. H., and McGill, M. J.: Initial performance assessment of CALIOP, *Geophysical Research Letters*, 34, <https://doi.org/10.1029/2007GL030135>, 2007.
- Zhang, P., Ban, Y., and Nascetti, A.: Learning U-Net without forgetting for near real-time wildfire monitoring by the fusion of SAR and optical time series, *Remote Sensing of Environment*, 261, 112 467, <https://doi.org/10.1016/j.rse.2021.112467>, 2021.
- 515 Zhong, Q., Schutgens, N., van der Werf, G., van Noije, T., Tsigaridis, K., Bauer, S. E., Mielonen, T., Kirkevåg, A., Seland, Ø., Kokkola, H., Checa-Garcia, R., Neubauer, D., Kipling, Z., Matsui, H., Ginoux, P., Takemura, T., Le Sager, P., Rémy, S., Bian, H., Chin, M., Zhang, K., Zhu, J., Tsyro, S. G., Curci, G., Protonotariou, A., Johnson, B., Penner, J. E., Bellouin, N., Skeie, R. B., and Myhre, G.: Satellite-based evaluation of AeroCom model bias in biomass burning regions, *Atmospheric Chemistry and Physics*, 22, 11 009–11 032, <https://doi.org/10.5194/acp-22-11009-2022>, 2022.
- 520

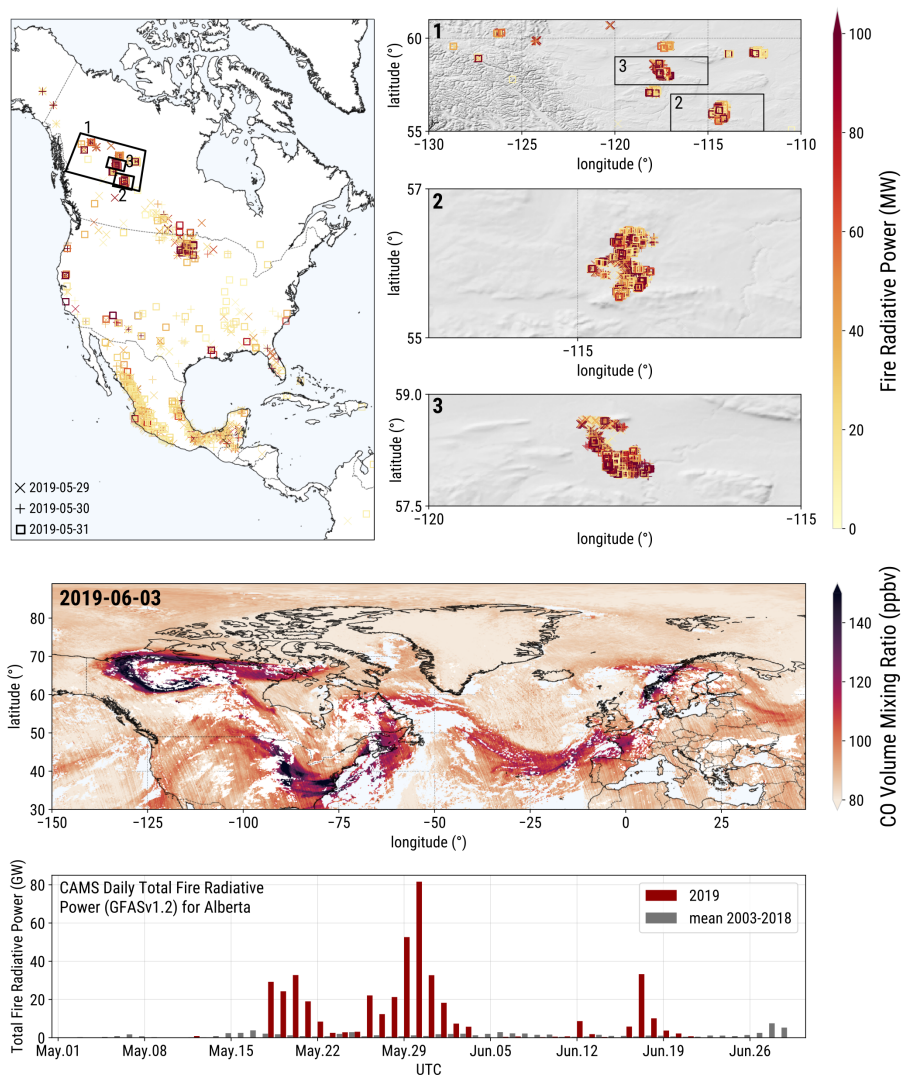

**Figure 1.** Overview of the Canadian wildfire event. Top: the fire radiative power on 29, 30, 31 May 2019 are shown by different symbols. Middle: The TROPOMI observations of CO (carbon monoxide) on 3 June 2019. Bottom: CAMS daily total fire radiative power (GFASv1.2) for Alberta from May to June 2019, compared with the 2003-2018 mean daily total

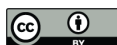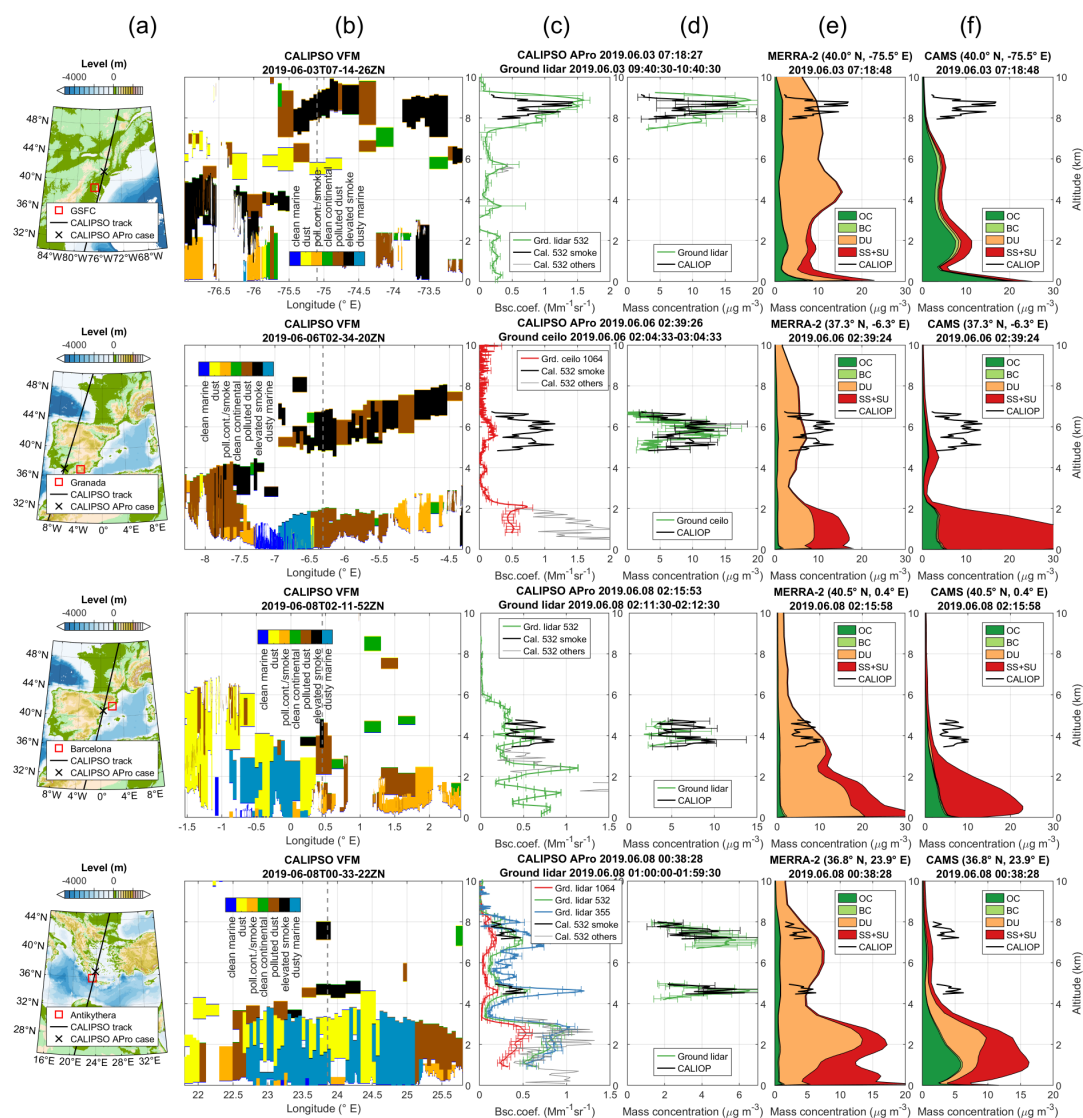

**Figure 2.** Comparison of vertical profiles of observations and simulations. Four sites with nearby CALIPSO overpasses, from top to down: GSFC (MPLNET), Washington DC, USA; Granada (Cloudnet), Spain; Barcelona (MPLNET), Spain; Antikythera (PollyNET), Greece. (a) Ground-based site location, CALIPSO track, and selected CALIOP aerosol profile (APro) case location. (b) CALIPSO Level 2 Vertical Feature Mask (VFM) product with granule (yyyy-mm-ddTHH-MM-SS) given. (c) Backscatter coefficients at 532 nm from CALIOP (Cal.) Level 2 5km APro product (corresponding to dashed line in (b)), with elevated smoke in black and other aerosol types in gray. Backscatter coefficients from ground-based (Grd.) lidar or ceilometer at 532/1064/355 nm are also shown, with the time-averaging window given on the top. (d) Mass concentrations of the smoke layers, estimated from CALIOP or ground-based lidar/ceilometer. (e-f) Mass concentrations of different components (OC - organic carbon, BC - black carbon, DU - dust, SS - sea salt, SU - sulphate) from MERRA-2 or CAMS models.



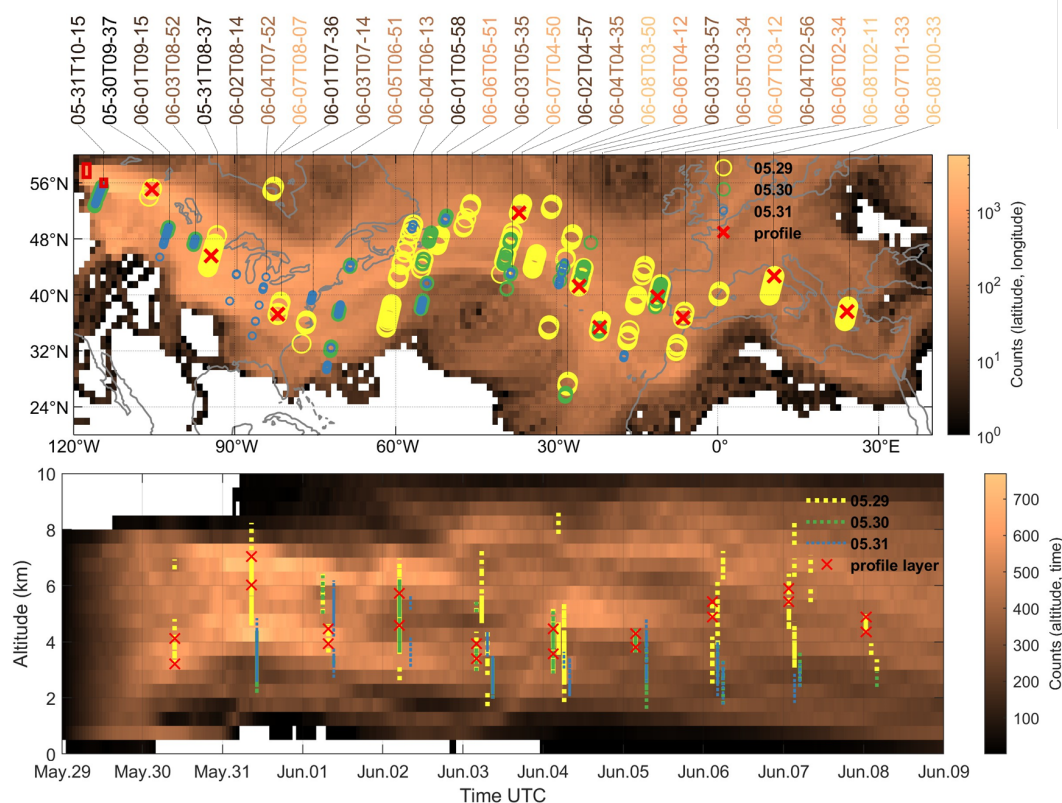

**Figure 3.** Trajectory frequency plots (29 May as source) with automatically selected CALIOP smoke layers (from fire sources originating on 29, 30, or 31 May shown by circles (top) and dashed lines (bottom) with different colors and sizes). The corresponding CALIPSO granule information is given as "mm-ddTHH-MM" on the top, with color scales showing from earlier (darker) to later (lighter) dates. Red cross: CALIOP Apro profile cases used in Fig. 5. Two sub-regions of fire source areas are given in red rectangles on the top-left in the top figure.

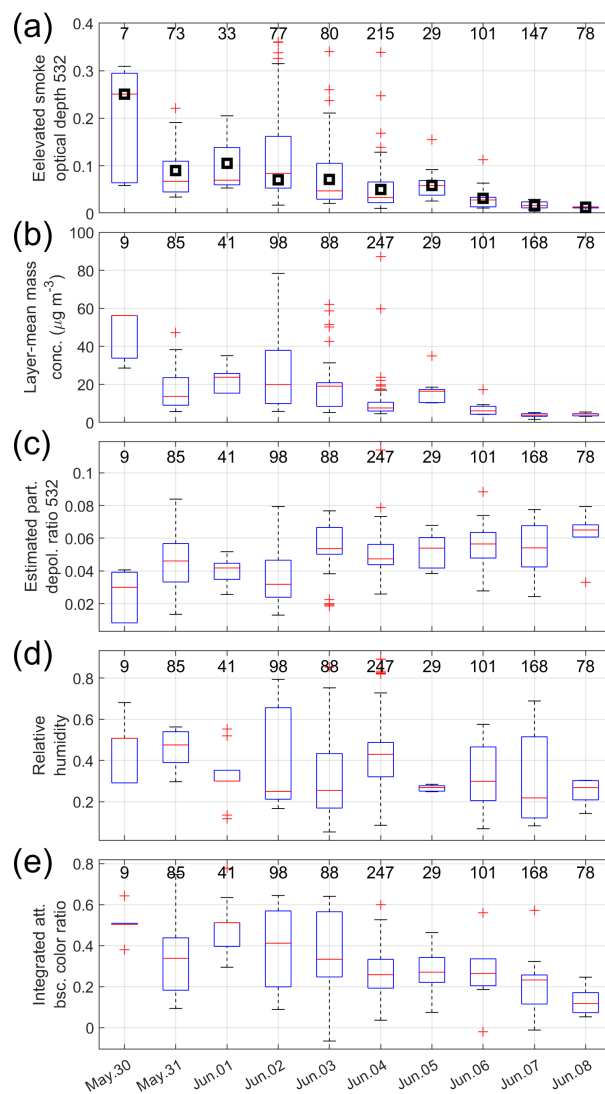

**Figure 4.** Statistical properties of smoke layers originating from the Alberta plume event on 29 May 2019. CALIPSO Level 2 5km ALay products were used. Used layer numbers in each boxplot are given on the top. AODs of the smoke layers used in Fig. 5 are shown as black squares in (a).



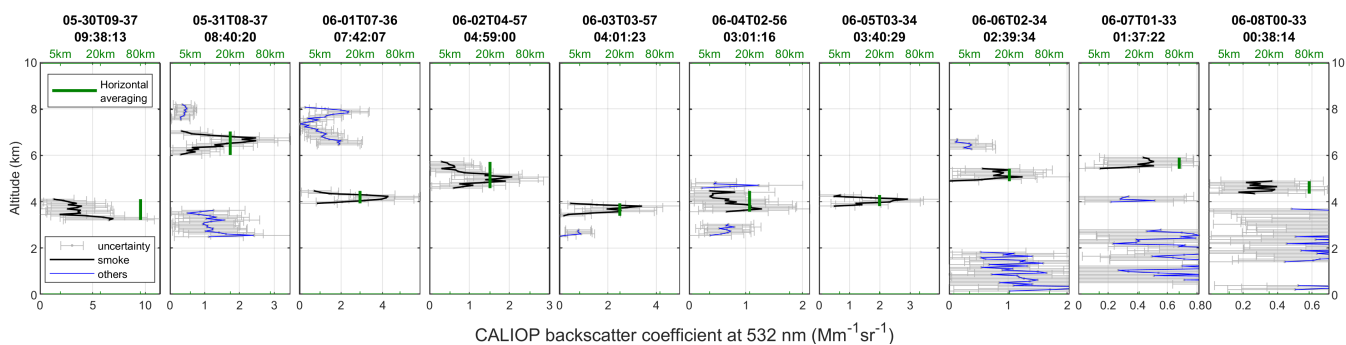

**Figure 5.** Profile examples. One profile was selected each day (only originated from one day source). CALIPSO Level 2 5km APro products were used. The CALIPSO granule and profile time are given on top. Backscatter coefficients of the elevated smoke type (or other aerosol types) are shown in black (or blue), with the uncertainties given in gray. The horizontal averaging applied is in green.

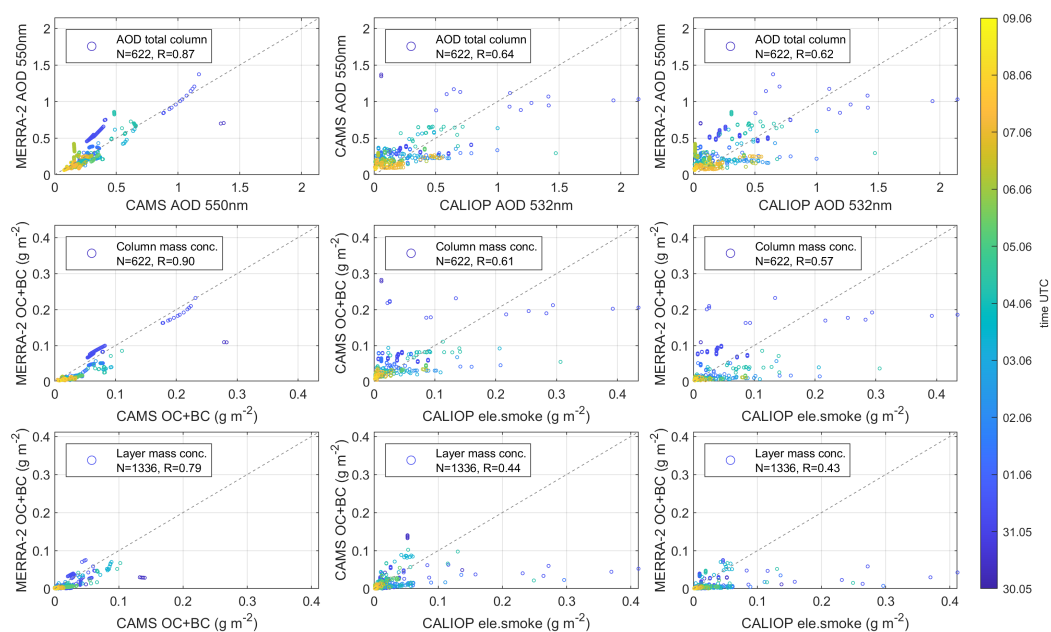

**Figure 6.** Comparison of observed and simulated products for locations where CALIOP detected smoke layers. 1st row: total column AOD (tropospheric AODs from CALIOP). 2nd row: column mass concentration of black carbon (BC) and organic carbon (OC) of CAMS and MERRA-2, and summed layer mass concentration of CALIOP elevated smoke layers. 3rd row: layer mass concentrations of CALIOP elevated smoke layers, and layer mass concentrations (3 times depth of the CALIOP layers) of BC and OC of CAMS and MERRA-2.

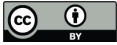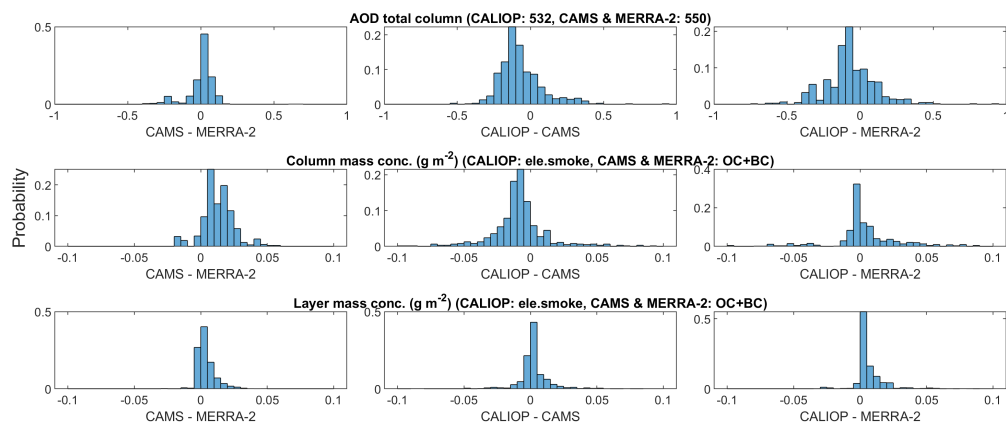

**Figure 7.** Similar with Fig. 6, but shown by histograms of the differences of observed and simulated products.

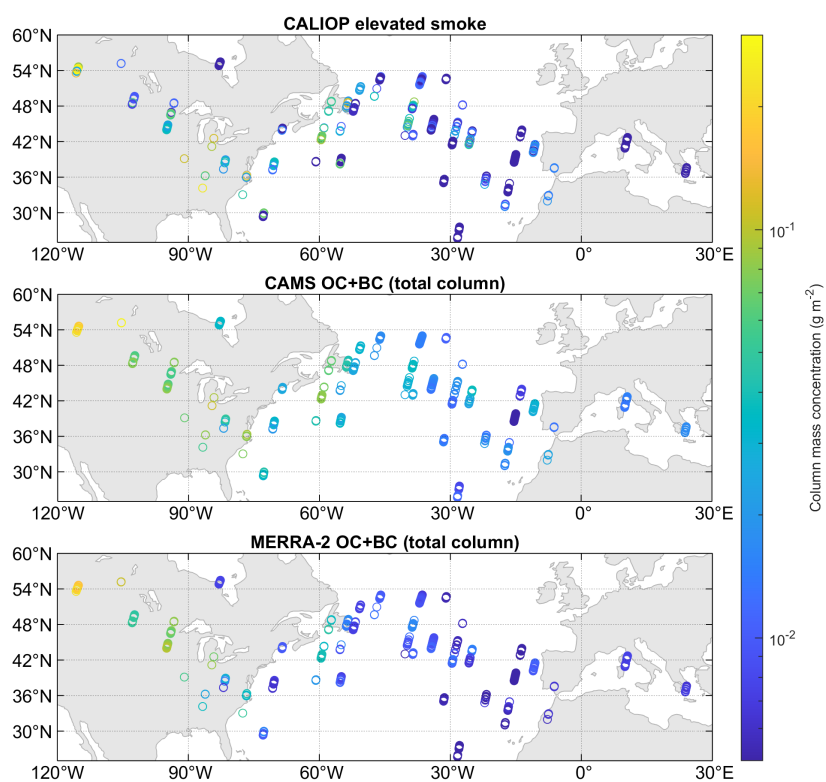

**Figure 8.** Column mass concentrations of smoke using CALIOP elevated smoke layers, black carbon (BC) and organic carbon (OC) from CAMS, and BC and OC from MERRA-2.
